# Supplementary material for: A multifunctional shape-adaptive and biodegradable hydrogel with hemorrhage control and broad-spectrum antimicrobial activity for wound healing
Source: Royal Society of Chemistry journal article supplement (doi:10.1039/d0bm00800a), 2020-01-01
Supplement: d0bm00800a1.pdf [file d0bm00800a1.pdf]

## Supplementary Information

Multifunctional shape-adaptive and biodegradable hydrogel with hemorrhage control and broad-spectrum antimicrobial activity for wound healing

*Lingling Gao<sup>1,2</sup>, Jingjie Chen<sup>2</sup>, Wei Feng<sup>1,2</sup>, Qing Song<sup>2</sup>, Jingjing Huo<sup>2</sup>, Luofeng Yu<sup>1,2</sup>, Nian Liu<sup>1,2</sup>, Tengjiao Wang<sup>2</sup>, Peng Li<sup>1, 2, 3\*</sup> and Wei Huang<sup>1, 2\*</sup>*

<sup>1</sup>Key Laboratory of Flexible Electronics (KLOFE) and Institute of Advanced Materials (IAM) Jiangsu National Synergetic Innovation Center for Advanced Materials (SICAM), Nanjing Tech University, Nanjing, 211816, China

<sup>2</sup>Frontiers Science Center for Flexible Electronics (FSCFE), Xi'an Institute of Flexible Electronics (IFE), Xi'an Institute of Biomedical Materials and Engineering (IBME), Northwestern Polytechnical University (NPU), 127 West Youyi Road, Xi'an 710072, China

<sup>3</sup>The State Key Laboratory of Molecular Engineering of Polymers, Department of Macromolecular Science, Fudan University, Shanghai 200438, China

### Corresponding Authors

\*Peng Li: E-mail, [iamppli@nwpu.edu.cn](mailto:iamppli@nwpu.edu.cn) (Prof. P. Li)

\*Wei Huang: E-mail, [iamwhuang@nwpu.edu.cn](mailto:iamwhuang@nwpu.edu.cn) (Prof. W. Huang)

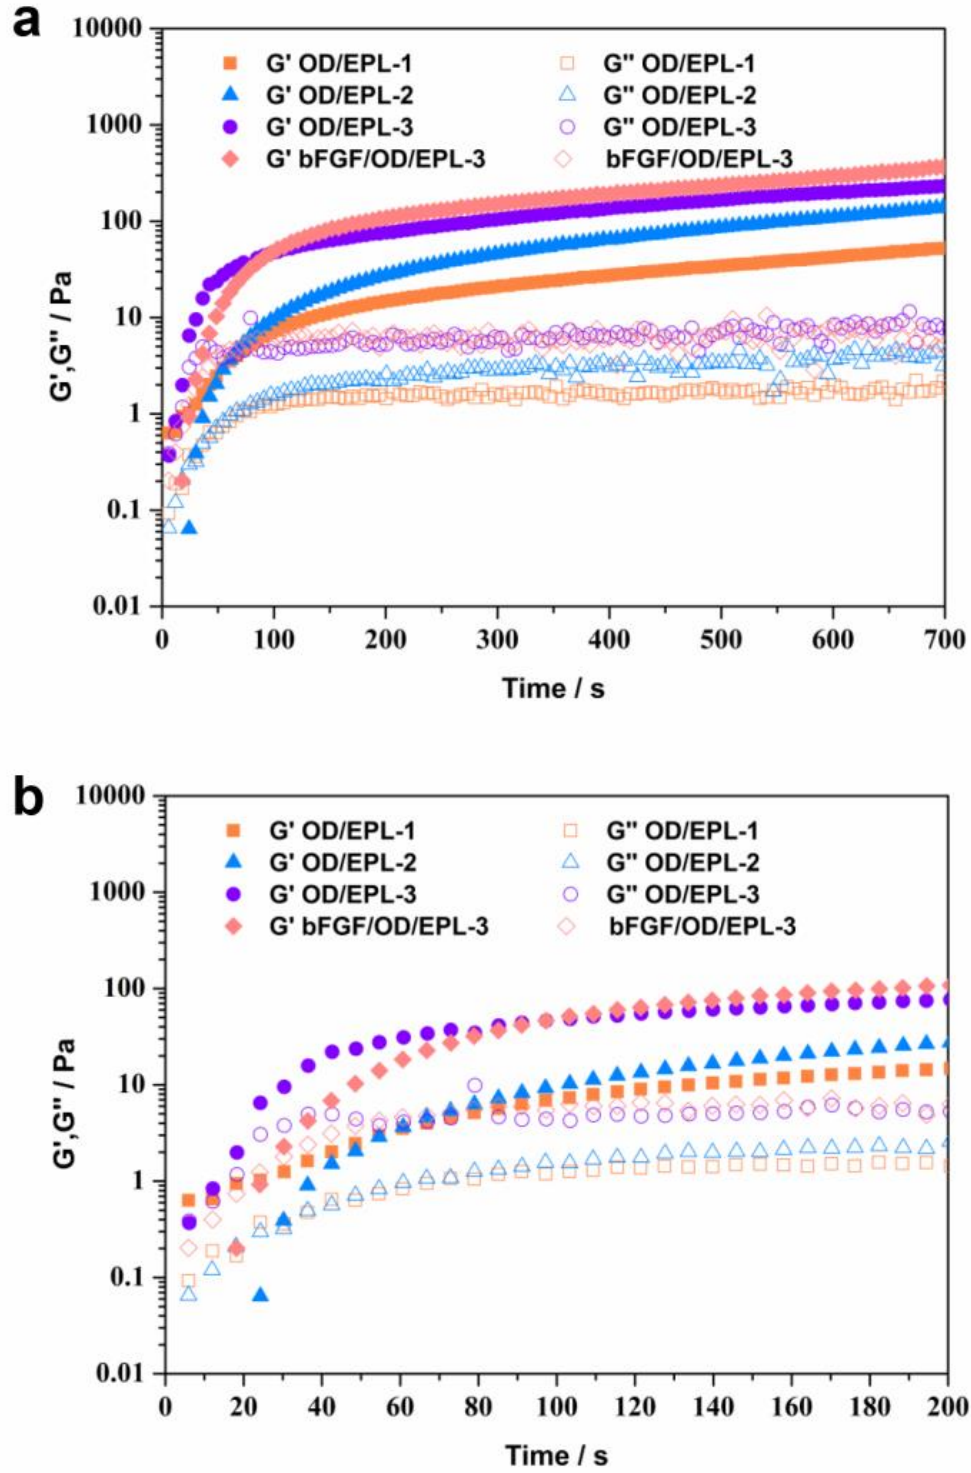

**Figure S1.**  $G'$  and  $G''$  of OD/EPL hydrogels with time (a) 0–700 s and (b) 0–200 s.

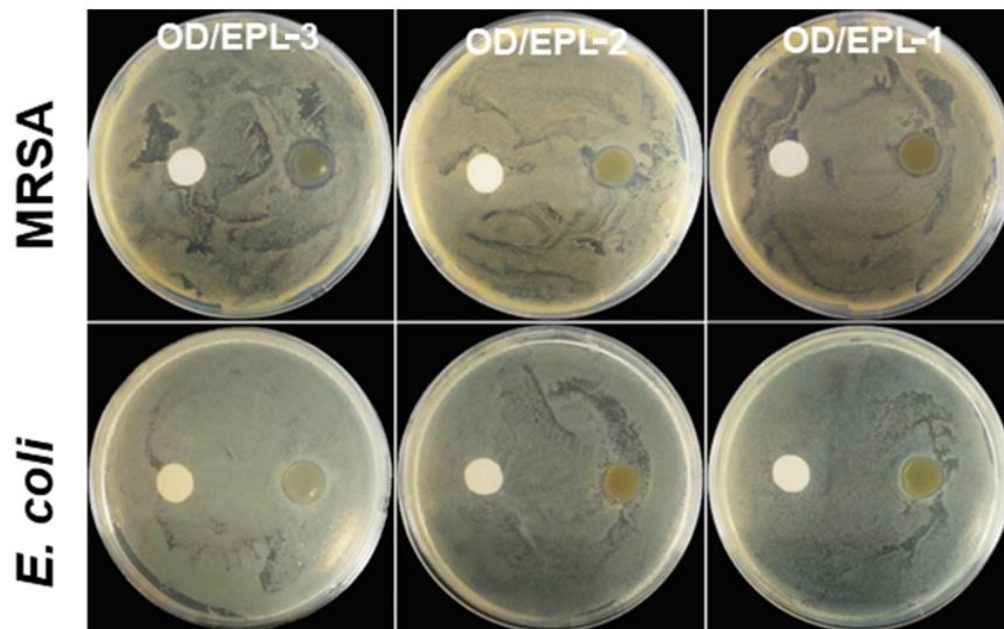

Figure S2. Photograph of inhibition zone of OD/EPL hydrogels against MRSA and *E. coli*.

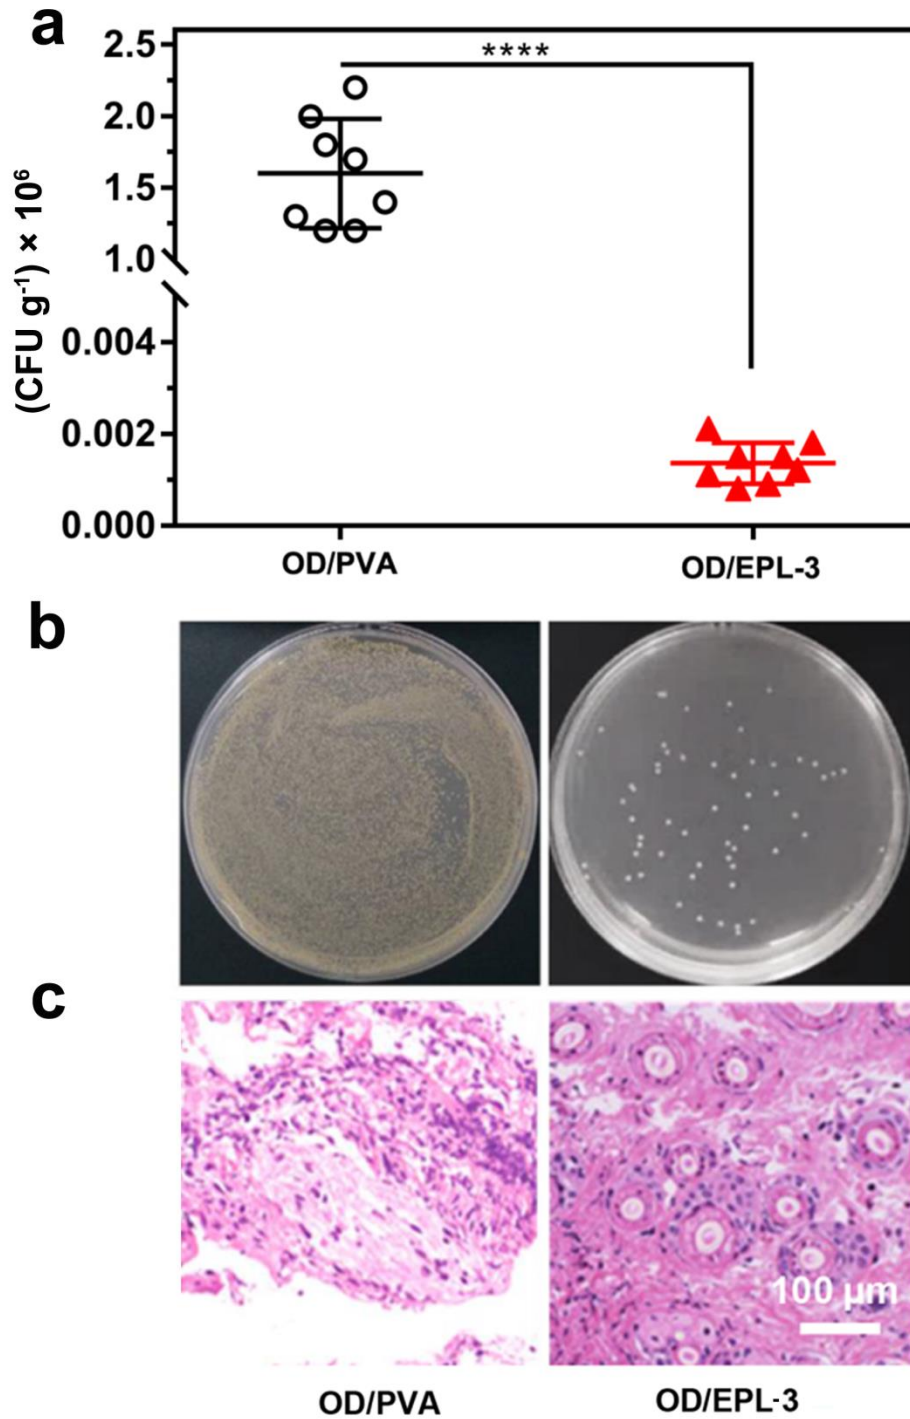

**Figure S3.** *In vivo* antibacterial activity against MRSA in a mouse subcutaneous model. (a) Bacterial colony count (CFU) at infectious sites treated with control OD/PVA hydrogel and OD/EPL-3 hydrogel (\*\*\*)  $p < 0.001$ ). (b) Optical images of survival bacterial colonies on the infectious sites. (c) H&E staining images of the tissue adjacent to OD/PVA, OD/EPL-3 hydrogel at day 1 after implantation.

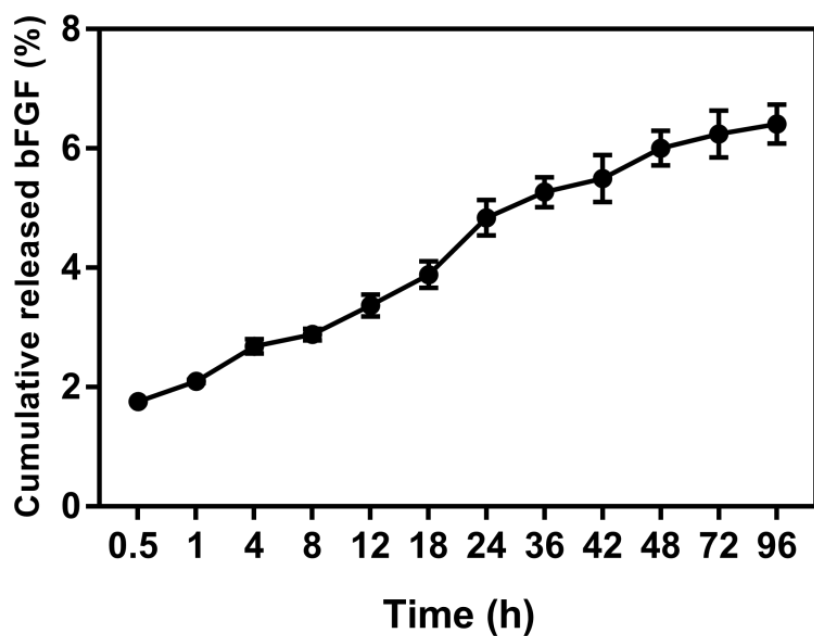

**Figure S4.** Release profiles of bFGF from bFGF/OD/EPL-3 hydrogel. Results are expressed as the cumulative percentage release during 96 h of bFGF, relative to its total amount incorporated in the hydrogel.

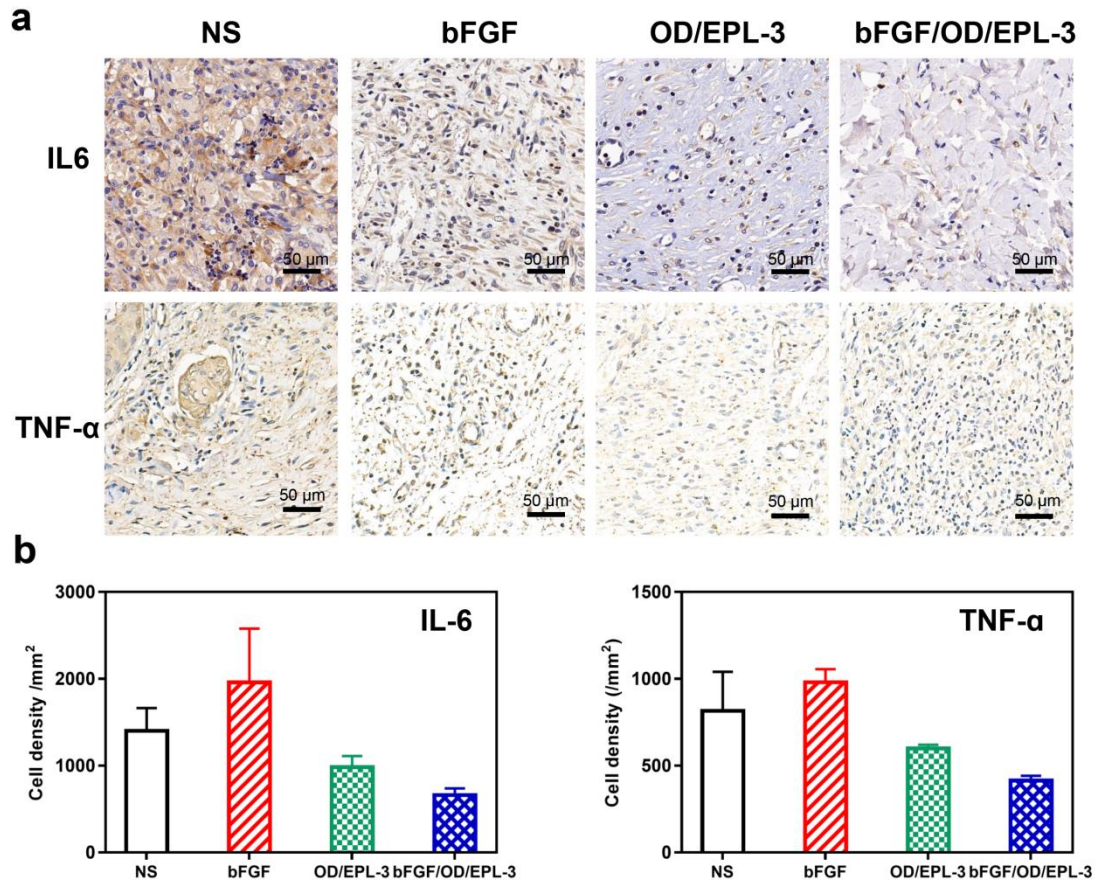

**Figure S5.** (a) Immunohistochemical (IL-6 and TNF- $\alpha$ ) staining images, and (b) Quantitative result of positive cell density infiltrated into the wound section at day 7 after treatment with NS, bFGF, OD/EPL-3 and bFGF/OD/EPL-3 hydrogels.

**Table S1.** The MIC values of EPL against various bacteria.

| <b>Microorganism</b> | <b>MIC (<math>\mu\text{g mL}^{-1}</math>)</b> |
|----------------------|-----------------------------------------------|
| MRSA                 | 4                                             |
| <i>E. coli</i>       | 8                                             |
| <i>P. aeruginosa</i> | 8                                             |
